# Supplementary material for: The Metabolic Landscape of Thymic T Cell Development In Vivo and In Vitro
Source: PubMed Central journal article supplement (PMC8355594; doi:10.3389/fimmu.2021.716661), 2021-07-28
Supplement: Image_1.pdf [file Image_1.pdf]

## Supplementary Figure 1

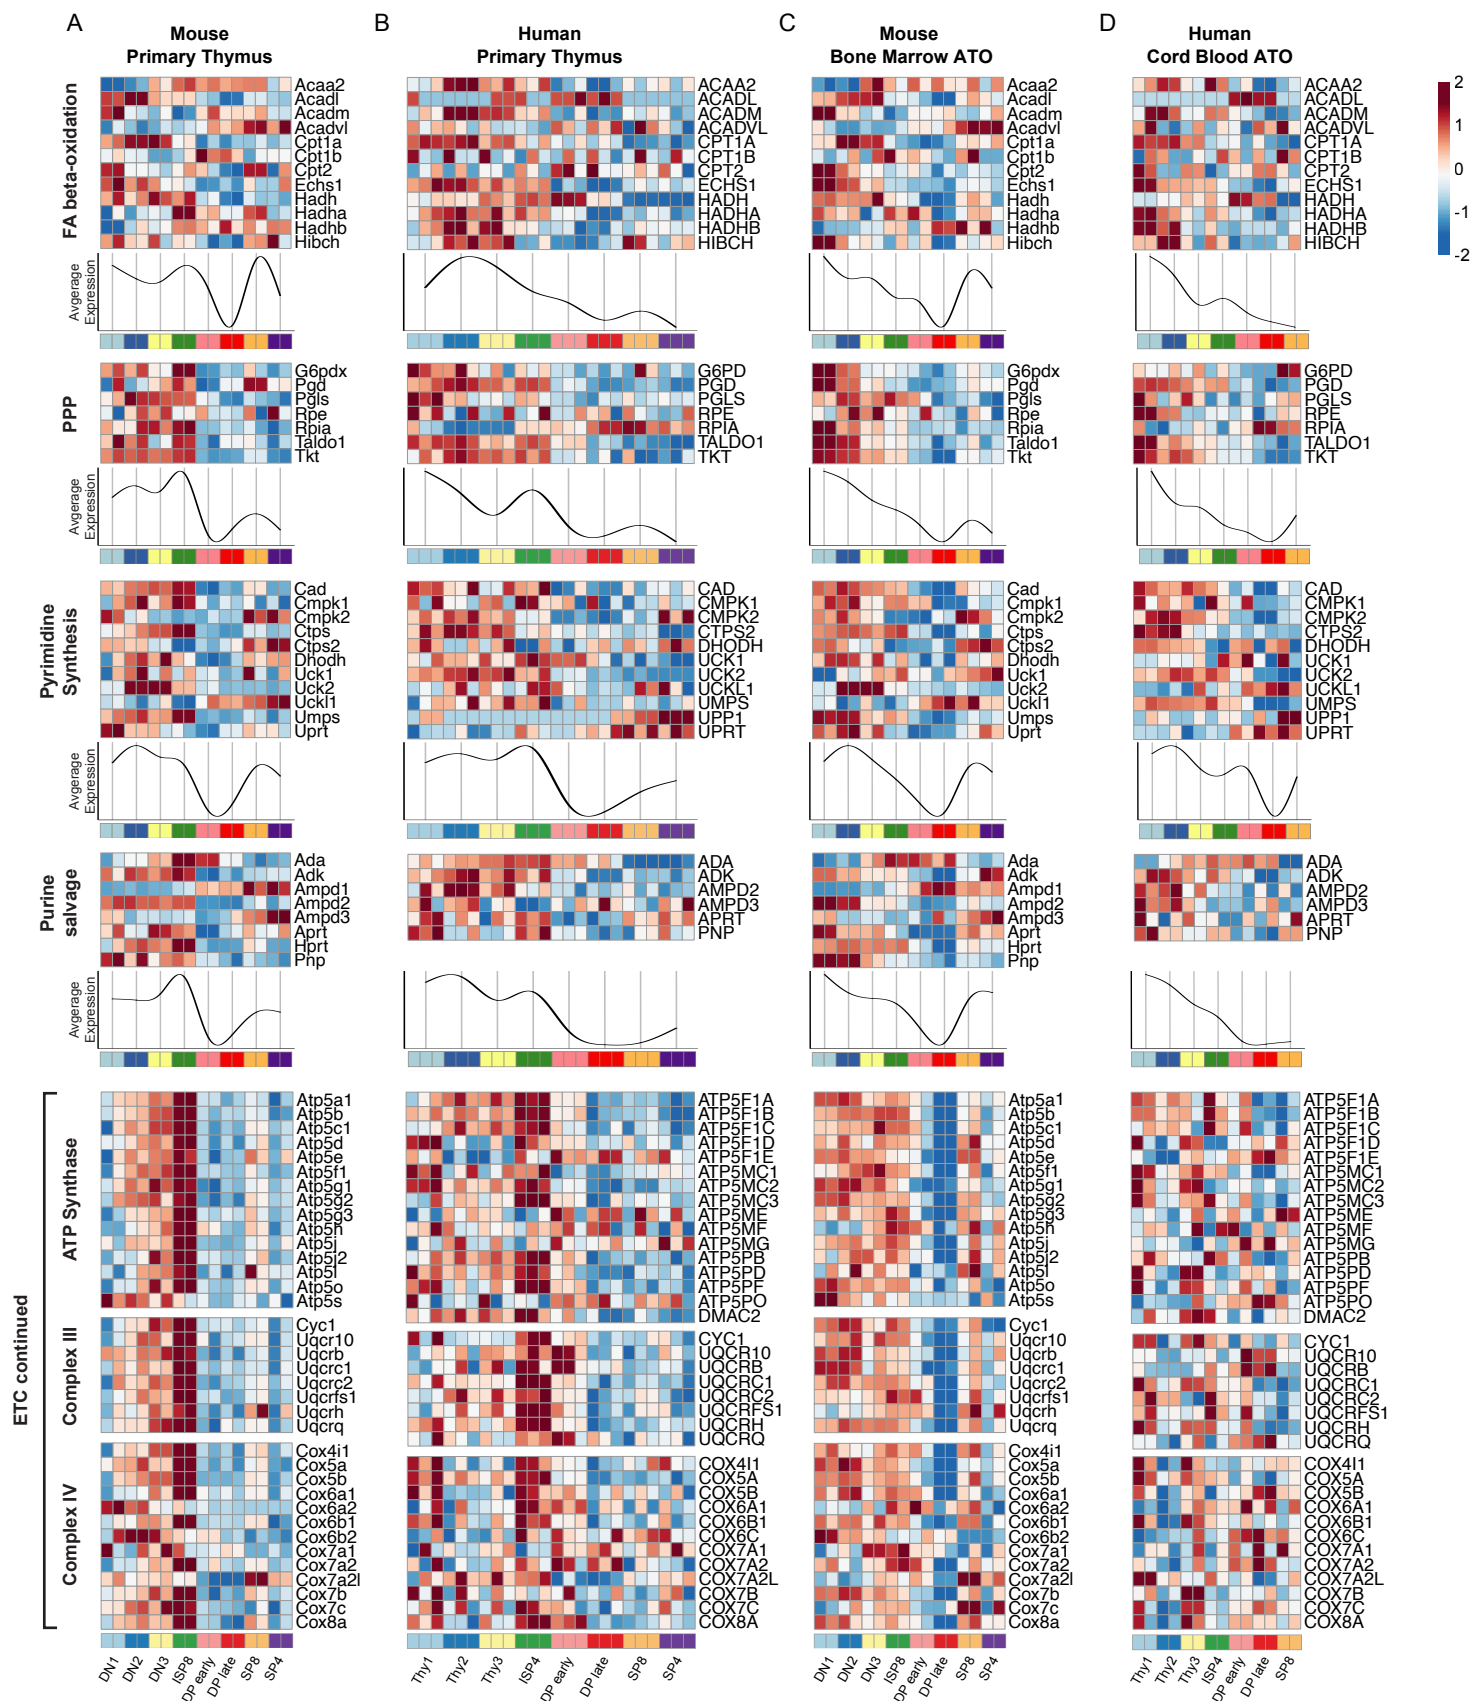

### Supplementary Figure 1 (related to Figure 3):

(A-D) Summary heatmaps and line plots of additional metabolic pathways (fatty acid beta-oxidation, pentose phosphate pathway, and nucleotide metabolism) and electron transport chain complexes in (A) M-THY, (B) H-THY, (C) M-ATO, and (D) H-ATO. The x axis indicates cell types isolated for analysis. Each individual heatmap represents z-scores of normalized variance-stabilized gene expression data. Line plots represent the average z-score for all genes in the heatmap. (n=2 independent replicates per population in M-THY and M-ATO; n=3 in H-THY; n=2 in H-ATO)
