# Supplementary material for: The Metabolic Landscape of Thymic T Cell Development In Vivo and In Vitro
Source: PubMed Central journal article supplement (PMC8355594; doi:10.3389/fimmu.2021.716661), 2021-07-28
Supplement: Image_2.pdf [file Image_2.pdf]

## Supplementary Figure 2

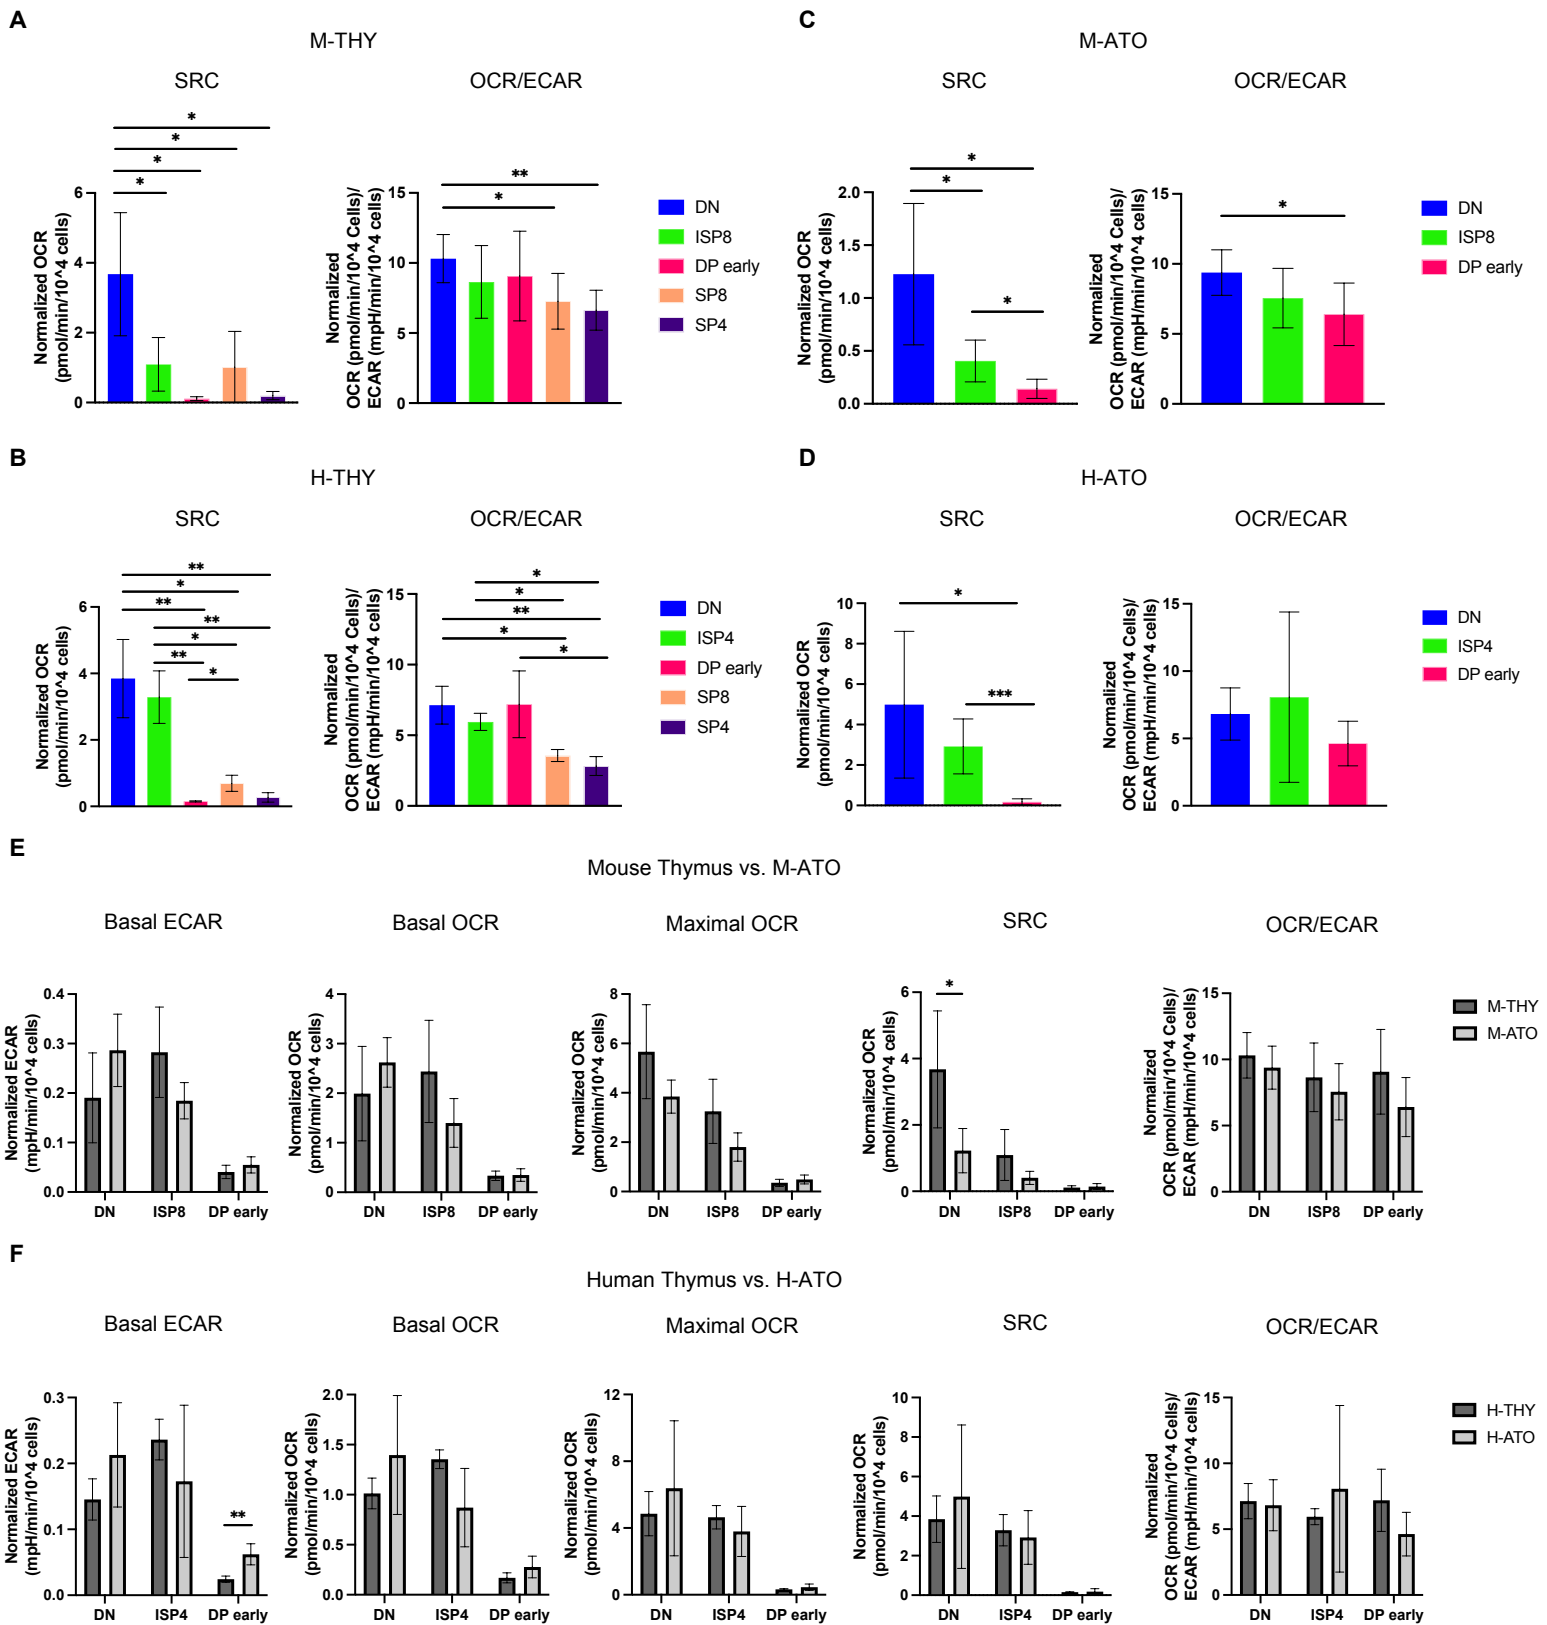

### Supplementary Figure 2 (related to Figure 4):

(A-D) SRC and OCR/ECAR ratio in thymocyte populations from (A) M-THY, (B) H-THY, (C) M-ATO, and (D) H-ATO. Measurements are normalized to cell number per well. (n=6 independent experiments in M-THY; n=6 MATO; n=3 H-THY [except for ISP4: n=2]; n=6 H-ATO [except for ISP4: n=5])

(E) Extracellular flux measurements are compared between M-THY and M-ATO. (n=6 independent experiments in M-THY; n=6 MATO)

(F) Extracellular flux measurements are compared between H-THY and H-ATO. (n=3 H-THY [except for ISP4: n=2]; n=6 H-ATO [except for ISP4: n=5])

(error bars: sd, significance: multiple t-test p values \* p<0.05; \*\* p<0.01, \*\*\* P<0.001)
