# Supplementary material for: The Metabolic Landscape of Thymic T Cell Development In Vivo and In Vitro
Source: PubMed Central journal article supplement (PMC8355594; doi:10.3389/fimmu.2021.716661), 2021-07-28
Supplement: Image_3.pdf [file Image_3.pdf]

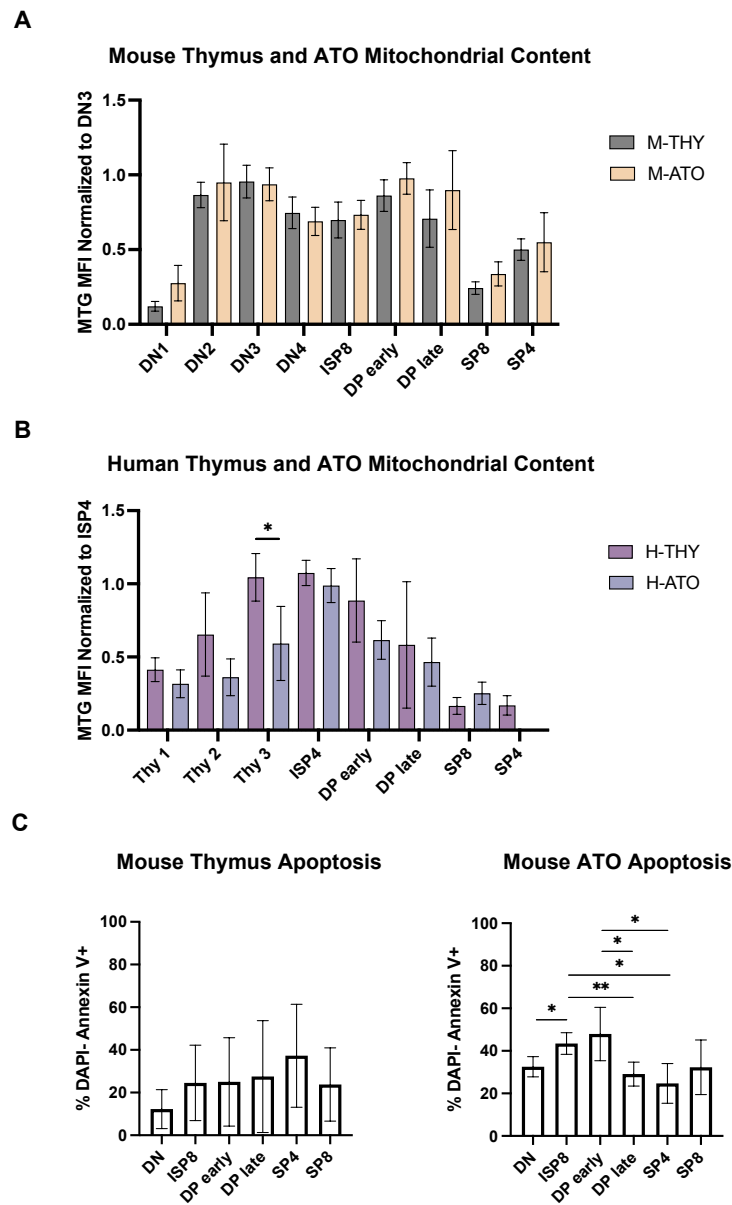

**Supplementary Figure 3 (related to Figure 4):**

(A-B) Mitochondrial content measurements using Mitotracker Green (MTG) in (A) M-THY and M-ATO, or (B) H-THY and H-ATO. MTG mean fluorescence intensity (MFI) was normalized to DN3 thymocytes in each experiment in M-THY and M-ATO, while MTG MFI was normalized to ISP4 thymocytes in each H-THY and H-ATO experiment. (n=6 independent experiments in M-THY, n=3 M-ATO, n=4 H-THY, n=6 CB-ATO).

(C) Proportion of early apoptotic cells (DAPI- Annexin V+) in M-THY and M-ATO thymocyte populations. (n=3 independent experiments in M-THY; n=4 M-ATO).

(error bars: sd, significance: multiple t-test p values \* p <0.05; \*\* p <0.01)
