# Supplementary material for: The Metabolic Landscape of Thymic T Cell Development In Vivo and In Vitro
Source: PubMed Central journal article supplement (PMC8355594; doi:10.3389/fimmu.2021.716661), 2021-07-28
Supplement: Image_4.pdf [file Image_4.pdf]

## Supplementary Figure 4

### Gene Expression of Cytoplasmic Ribosomal Genes

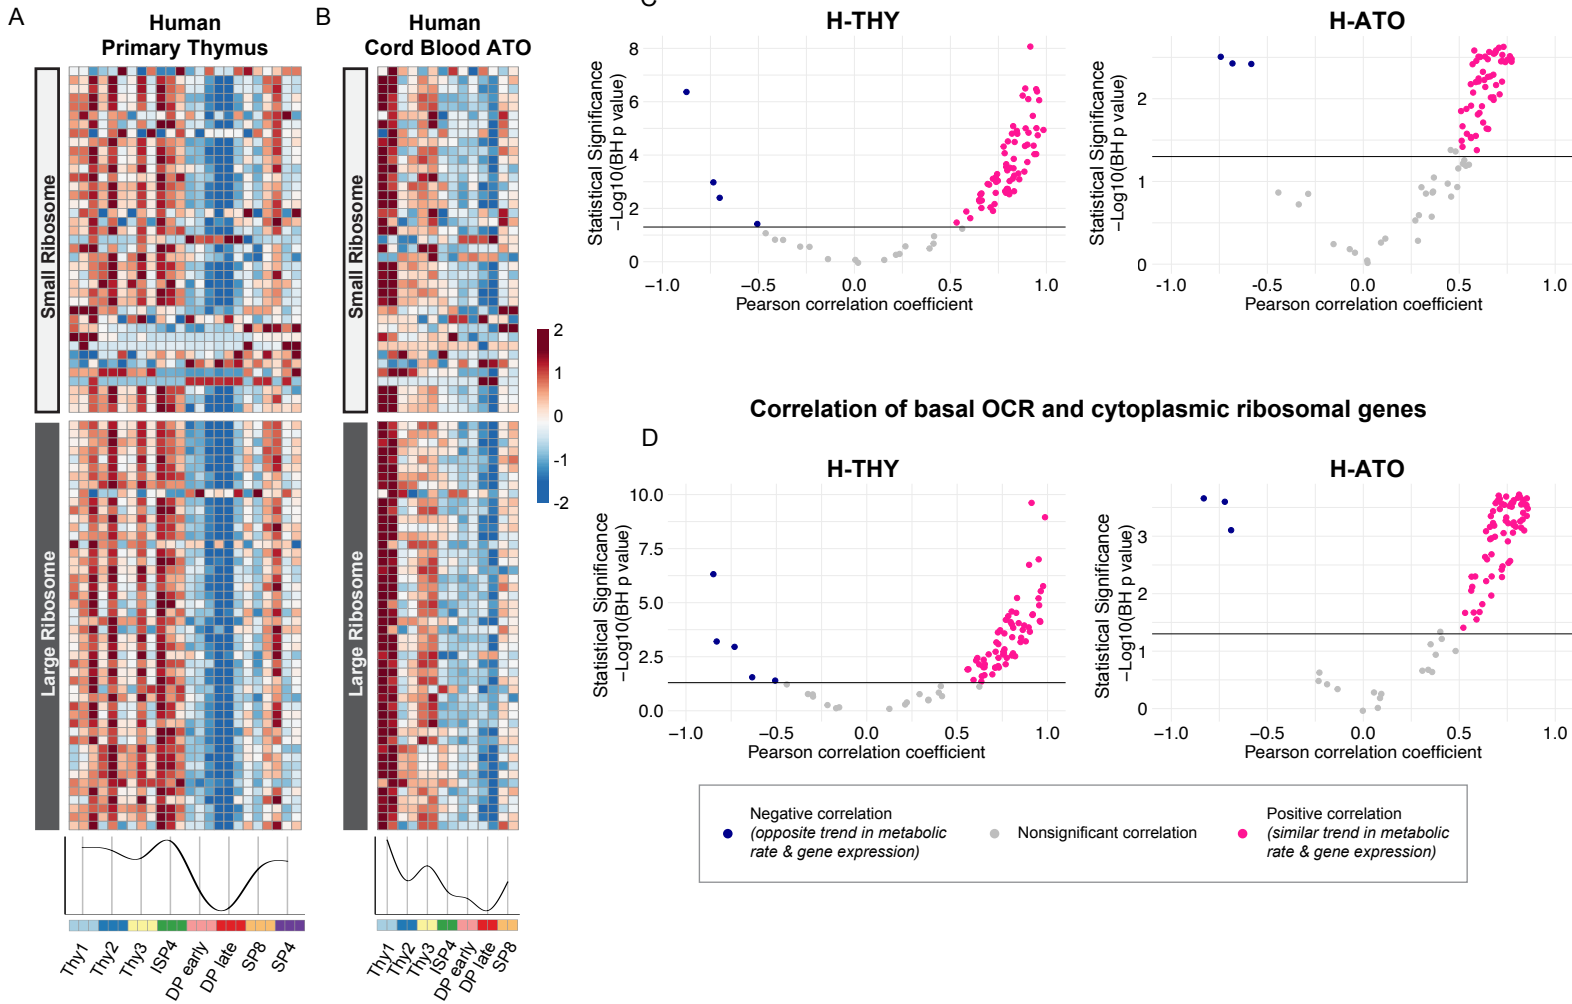

### Supplementary Figure 4 (related to Figure 6):

(A-B) Summary heatmaps and line plots of cytoplasmic ribosomal genes (small and large ribosome) in (A) H-THY and (B) H-ATO. The x axis indicates cells isolated for analysis. Each individual heatmap represents z-scores of normalized variance-stabilized gene expression data. Line plots represent the average z-score for all genes in the heatmap. (n=3 in H-THY; n=2 in H-ATO)

(C-D) Scatter plots show correlation between (C) small/large cytoplasmic ribosomal genes and basal glycolysis (ECAR) or (D) small/large cytoplasmic ribosomal genes and basal respiration (OCR) in the H-THY (left) or H-ATO (right). The x axis represents the Pearson correlation coefficient R values calculated for individual genes within the specified metabolic pathway for all thymocyte populations for which respective extracellular flux data was collected. The y axis represents the statistical significance of each R value using  $-\log_{10}$  of Benjamini-Hochberg adjusted p-values. Solid black line indicates an adjusted p-value of 0.05; all R values above the line are statistically significant. Genes with R values  $>0.5$  (pink) are positively correlated with metabolic flux data, while genes with R values  $<-0.5$  (blue) are negatively correlated with metabolic flux data. Nonsignificant or weak correlation R values  $>-.05$  or  $<0.5$  are indicated in grey. (H-THY: n=3 flux analysis values for 5 populations [except for ISP4: n=2], n=3 RNA-seq replicates; H-ATO: n=6 flux analysis values for 3 populations [except for ISP4: n=5], n=2 RNA-seq replicates)
